# Supplementary material for: Identification of radiolytic products of [C4mim][NTf2] and their effects on the Sr2+ extraction
Source: Royal Society of Chemistry journal article supplement (doi:10.1039/c2dt32418k), 2012-12-21
Supplement: c2dt32418k.pdf [file c2dt32418k.pdf]

## Supporting Information

### Identification of radiolytic products of [C<sub>4</sub>mim][NTf<sub>2</sub>] and their effect on the Sr<sup>2+</sup> extraction

Yinyong Ao <sup>a</sup>, Jing Peng <sup>a</sup>, Liyong Yuan <sup>b</sup>, Zhenpeng Cui <sup>a</sup>, Cheng Li <sup>c</sup>, Jiuqiang Li <sup>a</sup> and Maolin Zhai

<sup>a\*</sup>

<sup>a</sup> Beijing National Laboratory for Molecular Sciences (BNLMS), Department of Applied Chemistry, College of Chemistry and Molecular Engineering, Peking University, Beijing 100871, China

<sup>b</sup> Institute of High Energy Physics, Chinese Academy of Sciences, Beijing 100049, China.

<sup>c</sup> Shanghai Institute of Applied Physics, Chinese Academy of Sciences, Shanghai 201800, China.

\* Corresponding authors: Tel/Fax: 86-10-62753794, E-mail: mlzhai@pku.edu.cn;

| Page No. | Contents |
|----------|----------|
|----------|----------|

|       |                                                                                                                                                                                                                      |
|-------|----------------------------------------------------------------------------------------------------------------------------------------------------------------------------------------------------------------------|
| S – 2 | Fig S1 The Micro-FTIR spectra of CF <sub>3</sub> SO <sub>2</sub> NH <sub>2</sub> (a) and the water-washed phase of irradiated [C <sub>4</sub> mim][NTf <sub>2</sub> ] (b).                                           |
| S – 3 | Fig S2 The <sup>19</sup> F NMR spectra of CF <sub>3</sub> SO <sub>2</sub> OH, [C <sub>4</sub> mim][NTf <sub>2</sub> ], CF <sub>3</sub> SO <sub>2</sub> NH <sub>2</sub> and CF <sub>3</sub> SOONa standard compounds. |
| S – 4 | Fig S3 The <sup>19</sup> F NMR spectra of CF <sub>3</sub> SO <sub>2</sub> NH <sub>2</sub> at different pH.                                                                                                           |
| S – 5 | Fig S4 Fourier transform magnitude (—) of the Sr K-edge EXAFS and first shell best fit (- -) of the Sr–crown ether complexes present in [C <sub>4</sub> mim][NTf <sub>2</sub> ] solutions.                           |
| S – 6 | Fig S5 UV-vis spectra of irradiated [C <sub>4</sub> mim][NTf <sub>2</sub> ] and water-washed irradiated [C <sub>4</sub> mim][NTf <sub>2</sub> ]                                                                      |

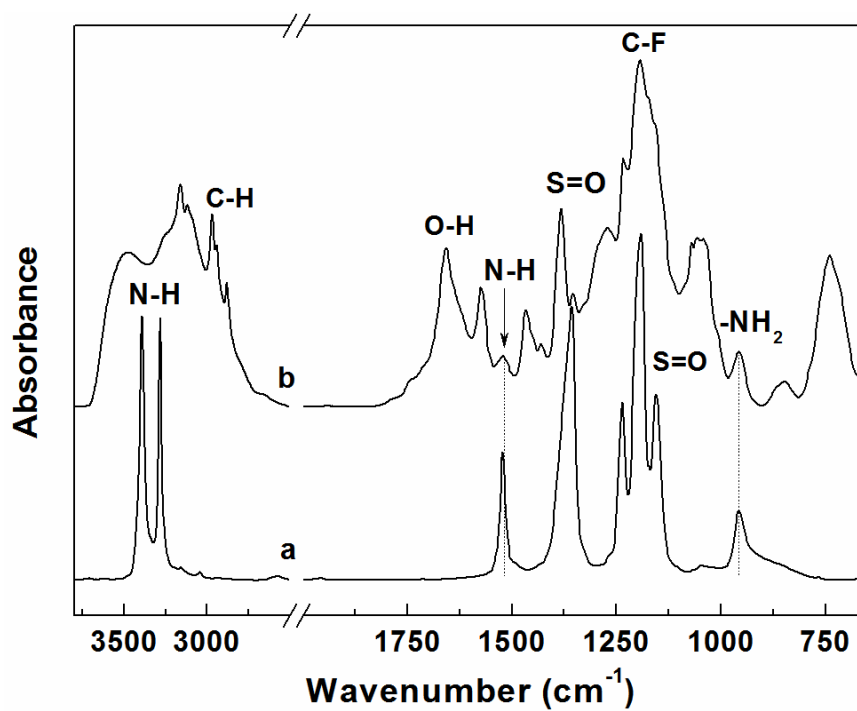

Fig S1 The Micro-FTIR spectra of  $\text{CF}_3\text{SO}_2\text{NH}_2$  (a) and the water-washed phase of irradiated  $[\text{C}_4\text{mim}][\text{NTf}_2]$  (b).

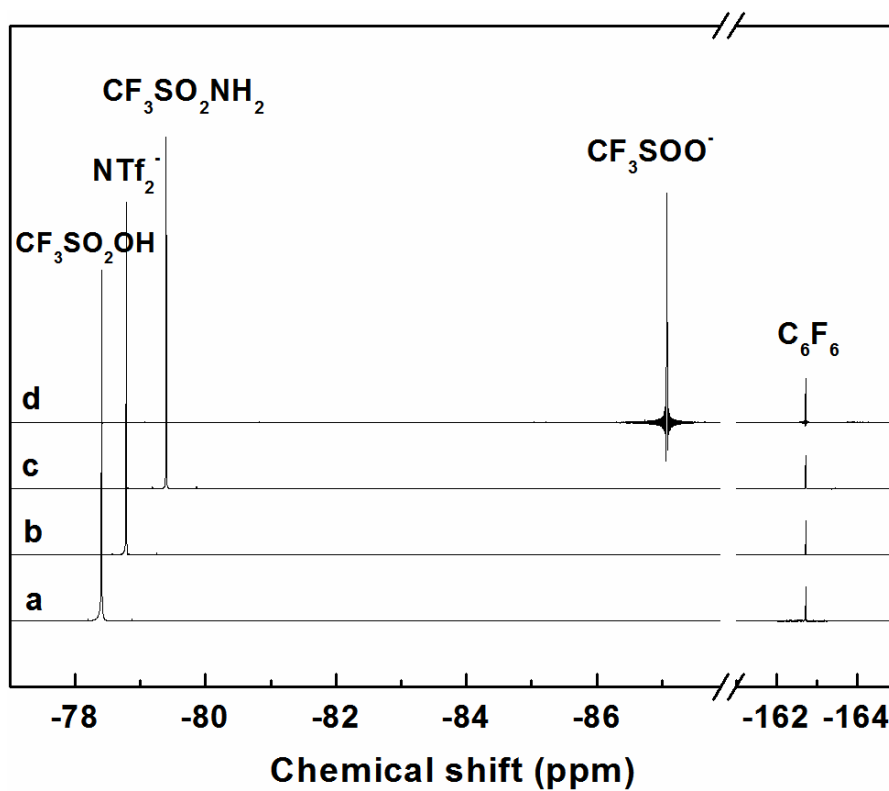

Fig S2 The  $^{19}\text{F}$  NMR spectra of  $\text{CF}_3\text{SO}_2\text{OH}$ ,  $[\text{C}_4\text{mim}][\text{NTf}_2]$ ,  $\text{CF}_3\text{SO}_2\text{NH}_2$  and  $\text{CF}_3\text{SOONa}$  standard compounds. (a:  $\text{CF}_3\text{SO}_2\text{OH}$ , -78.42 ppm; b:  $[\text{C}_4\text{mim}][\text{NTf}_2]$ , -78.78 ppm; c:  $\text{CF}_3\text{SO}_2\text{NH}_2$ , -79.36 ppm; d:  $\text{CF}_3\text{SOONa}$ , -78.07 ppm)

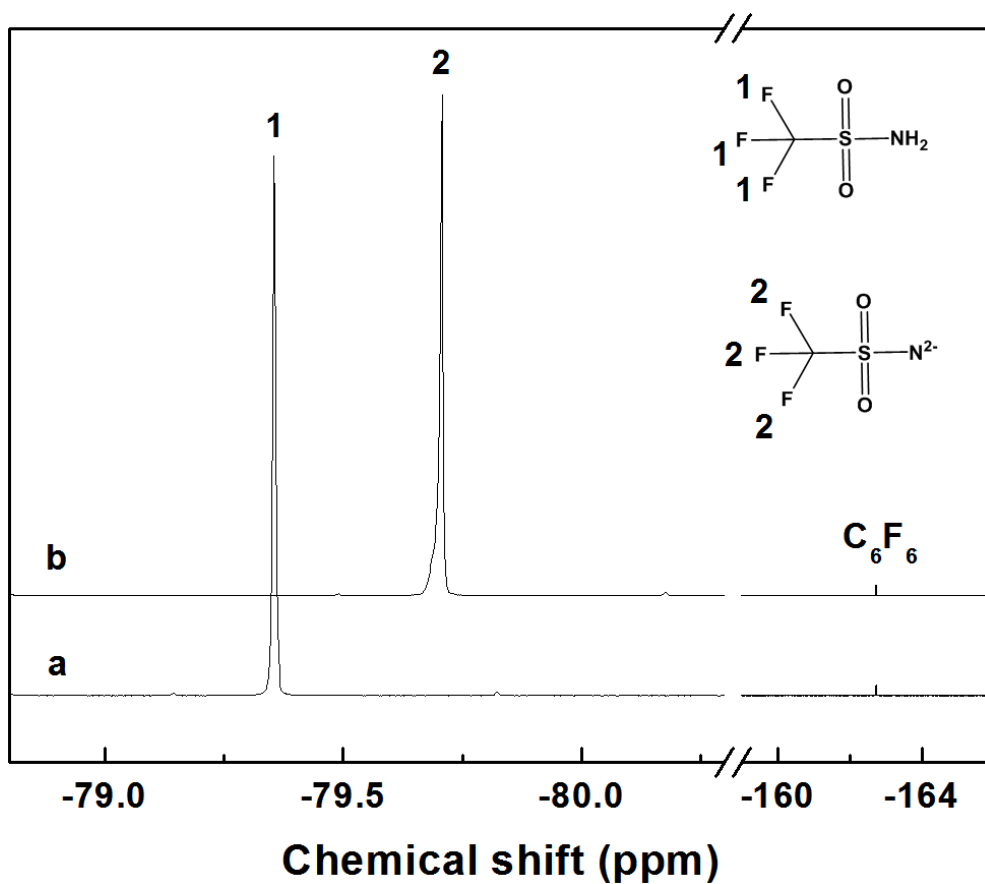

Fig S3 The  $^{19}\text{F}$  NMR spectra of  $\text{CF}_3\text{SO}_2\text{NH}_2$  at different pH (a: pH ca. 3; b: pH ca. 8).

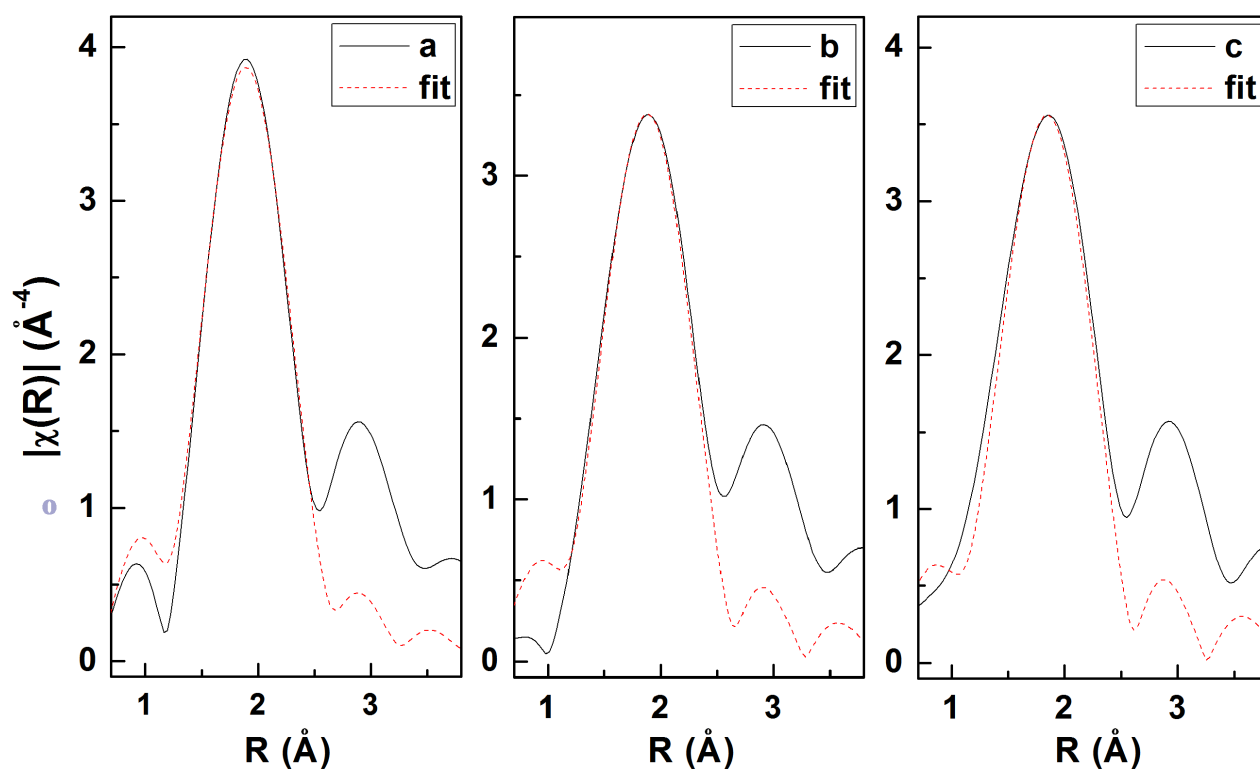

Fig S4 Fourier transform magnitude (—) of the Sr K-edge EXAFS and first shell best fit (- -) of the Sr-crown ether complexes present in  $[\text{C}_4\text{mim}][\text{NTf}_2]$  solutions. (a) 0.01 M  $\text{Sr}(\text{NO}_3)_2$  (aq) contacted with 0.1 M DCH18C6 in unirradiated  $[\text{C}_4\text{mim}][\text{NTf}_2]$ , (b) 0.01M  $\text{Sr}(\text{NO}_3)_2$  (aq) contacted with 0.1 M DCH18C6 in irradiated  $[\text{C}_4\text{mim}][\text{NTf}_2]$  at 550 kGy, (c) 0.01M  $\text{Sr}(\text{NO}_3)_2$  (aq) contacted with 0.1 M DCH18C6 in water-washed irradiated  $[\text{C}_4\text{mim}][\text{NTf}_2]$ .

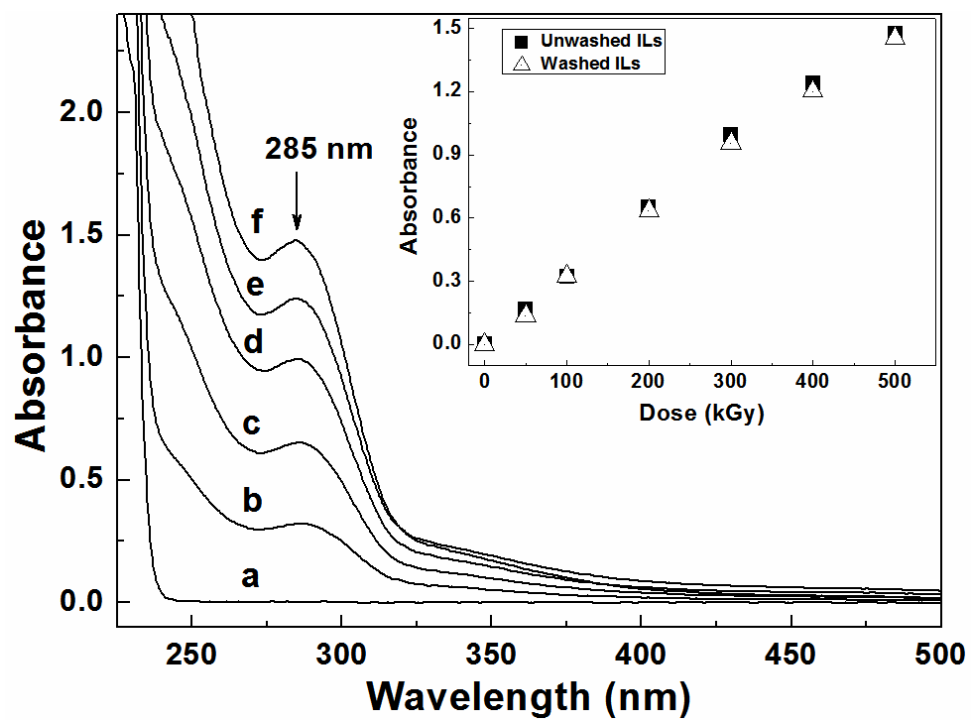

Fig S5 UV-vis spectra of irradiated [C<sub>4</sub>mim][NTf<sub>2</sub>] and water-washed irradiated [C<sub>4</sub>mim][NTf<sub>2</sub>] (a – e : 0, 100, 200, 300, 400, 500 kGy). Inset shows the relationship between absorption at 285 nm and doses.
